# Supplementary material
Source: PubMed Central journal article supplement (PMC4069238)
Supplement: NIHMS569475-supplement-02.pdf [file NIHMS569475-supplement-02.pdf]

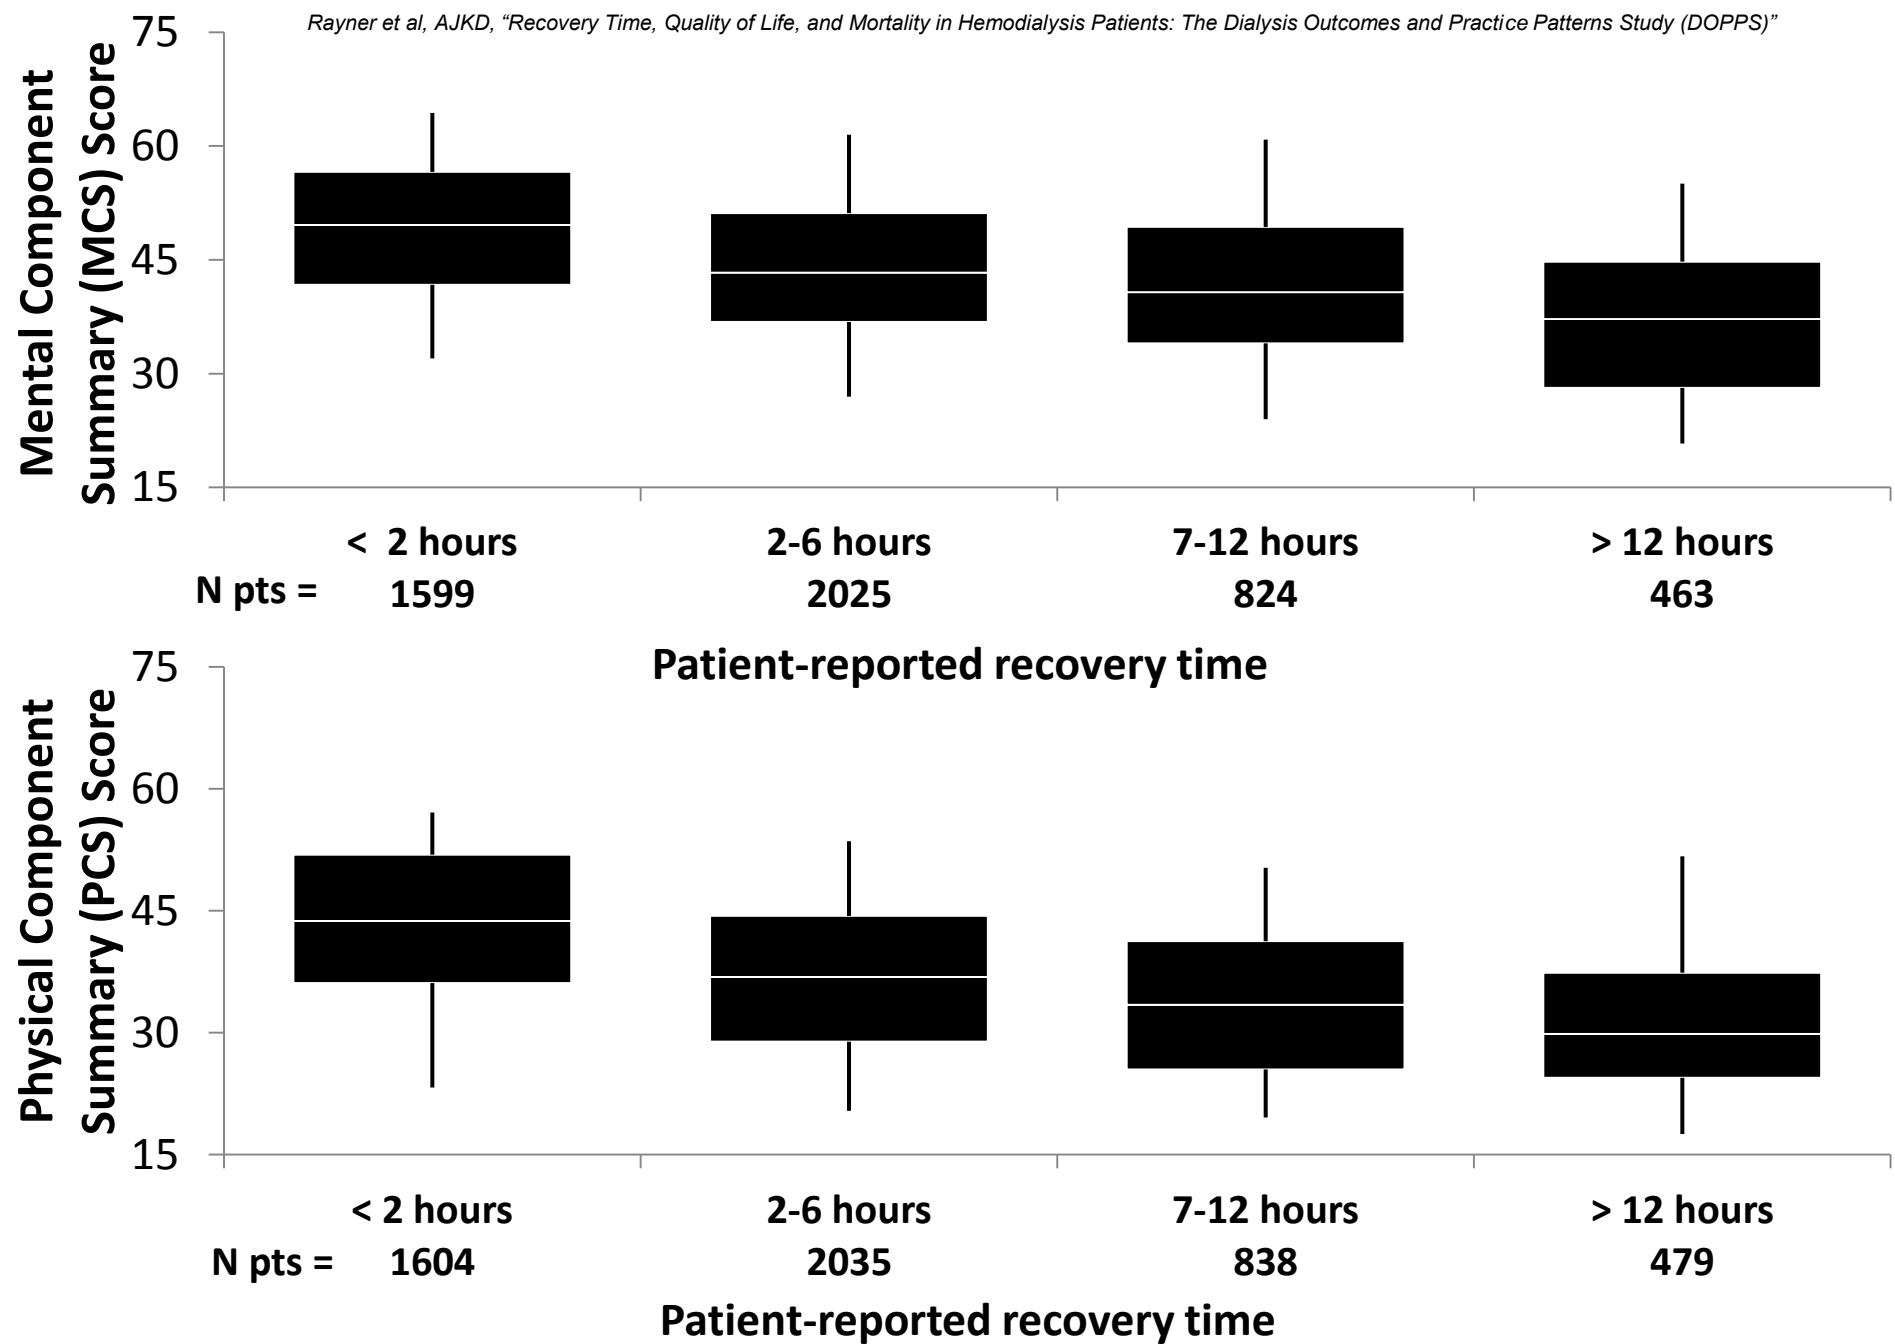

Figure S2. Distribution of Mental and Physical Component Summary scores of the KDQOL-36, by patient-reported recovery time category.

Overall test for trend  $p < 0.0001$  for MCS and  $p < 0.0001$  for PCS after adjusting for country, race (US black only), age, gender, 14 summary comorbidities, body mass index, and years on dialysis. Excludes patients with MCS score  $< 18$  and MCS score  $> 75$  or PCS score  $< 18$  and PCS score  $> 75$ .
