# Supplementary material
Source: PubMed Central journal article supplement (PMC4069238)

Figure S1. Distribution of reported recovery time categories, by DOPPS country.

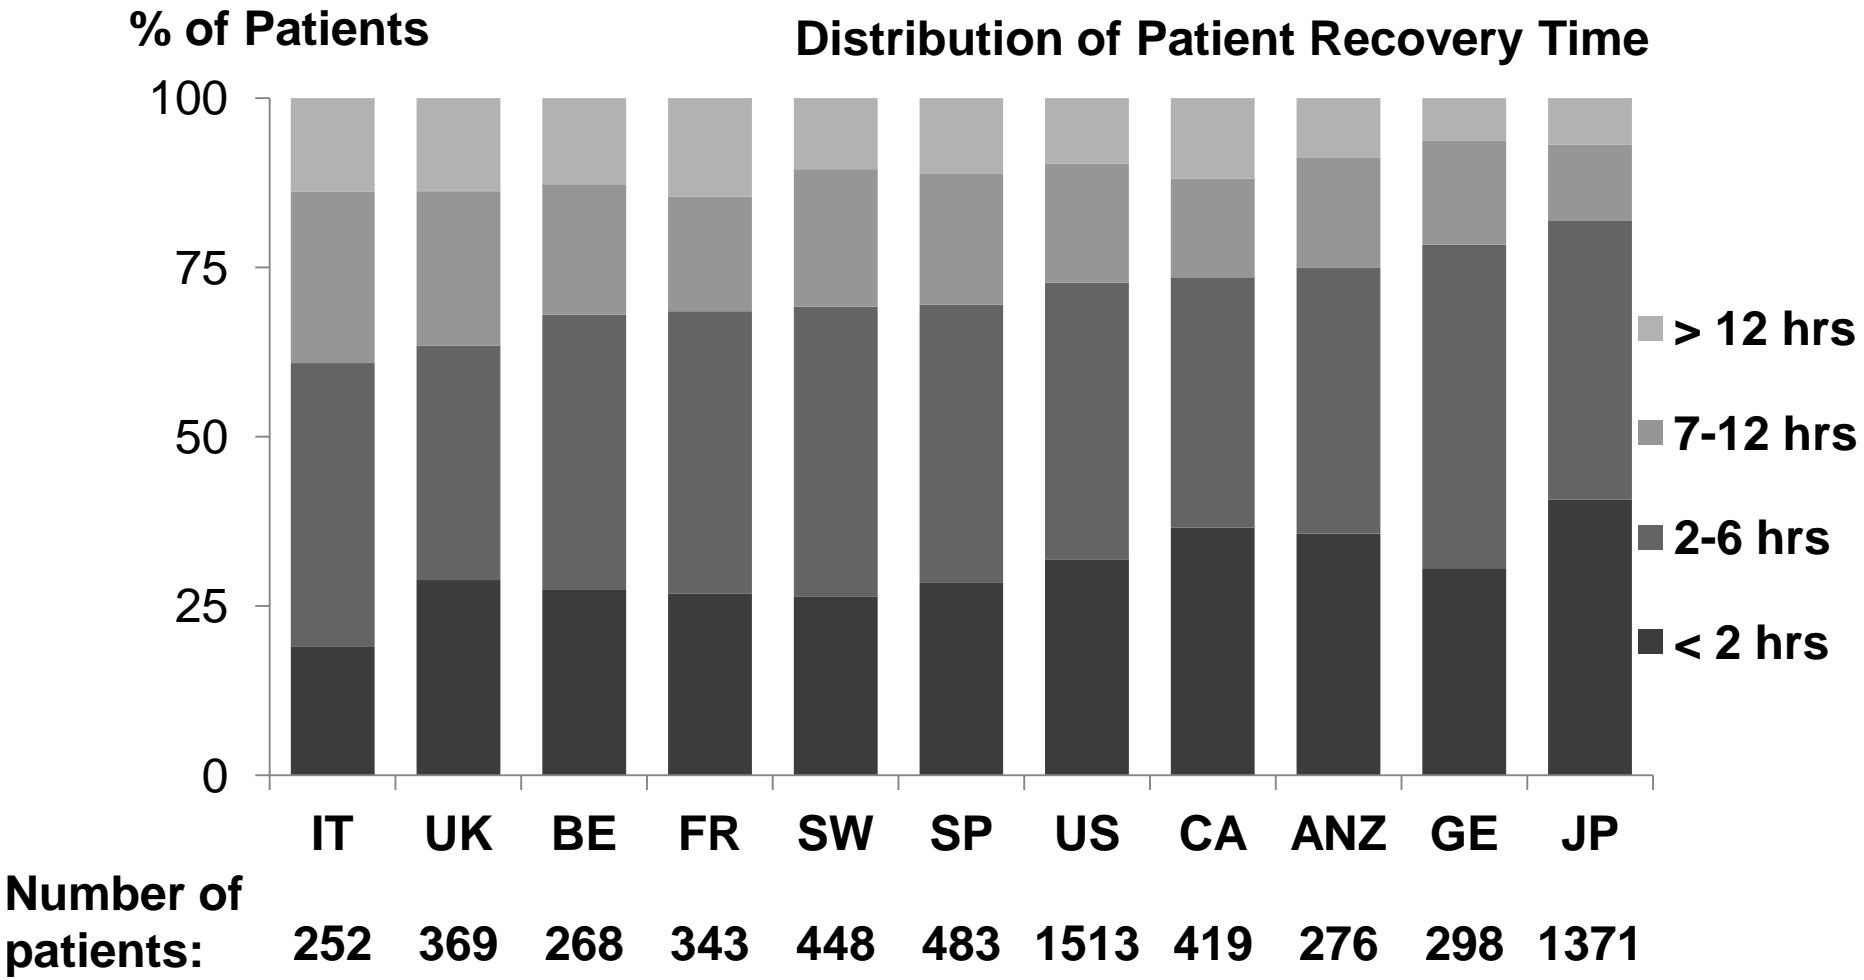

Supplement: NIHMS569475-supplement-01.pdf [file NIHMS569475-supplement-01.pdf]
